# Supplementary material
Source: PubMed Central journal article supplement (PMC3166365)
Supplement: NIHMS310912-supplement-Supp_Fig_S1.pdf [file NIHMS310912-supplement-Supp_Fig_S1.pdf]

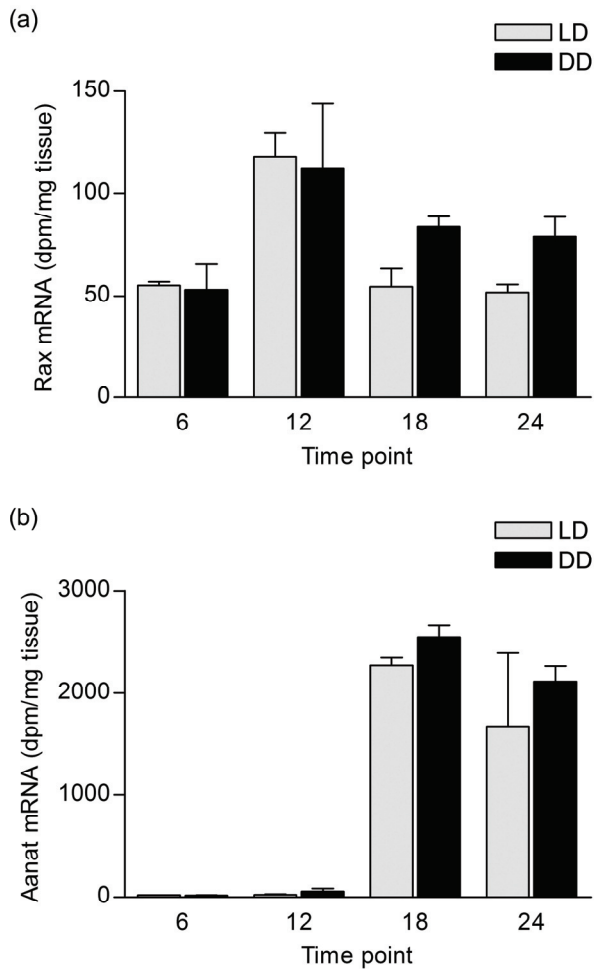

**Figure S1. The *Rax* expression profile in the adult rat pineal gland continues under constant darkness conditions.** Densitometric quantification of *in situ* hybridization autoradiographs of coronal brain sections through the pineal gland of rats housed under a 12:12 light-dark schedule (LD) or in constant darkness (DD), sacrificed in 6 h intervals at the indicated time points referring to Zeitgeber time in LD and circadian time in DD. (a) In the pineal gland, the *Rax* mRNA levels were dependent on the time of sampling ( $p < 0.01$ , two-way ANOVA) confirming the daily rhythm in pineal *Rax* expression, but there was no effect of changing the light-dark schedules (LD versus DD) under which the rats were housed ( $p = 0.24$ , two-way ANOVA). (b) The *Aanat* mRNA levels were quantified as a control. Pineal *Aanat* mRNA levels were dependent on the time of sampling ( $p < 0.0001$ , two-way ANOVA) confirming the daily rhythm in pineal *Aanat* expression, but there was no effect of changing the light-dark schedules (LD versus DD) under which the rats were housed ( $p = 0.33$ , two-way ANOVA). Values represent the mean  $\pm$  SEM of three animals at each time-point examined.
