# Supplementary material
Source: PubMed Central journal article supplement (PMC3166365)
Supplement: NIHMS310912-supplement-Supp_Fig_S2.pdf [file NIHMS310912-supplement-Supp_Fig_S2.pdf]

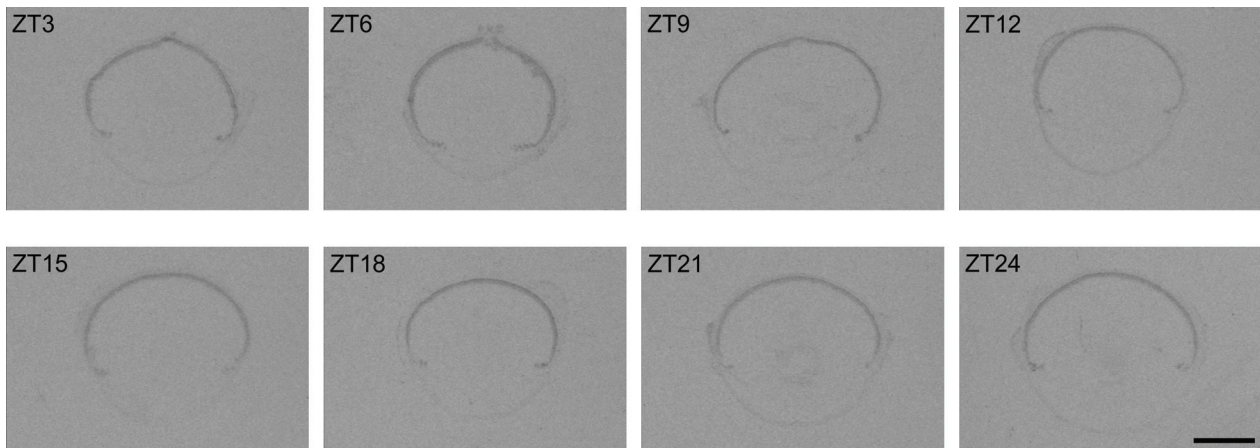

**Figure S2. Daily expression profile of *Rax* in the adult rat retina.** *In situ* hybridization autoradiographs of sections through the eyes of rats sacrificed in 3 h intervals at the indicated time points. Rats were housed under a 12:12 light-dark schedule. Scale bar, 2 mm.
